# Supplementary material
Source: Springer Nature journal article supplement (https://www.springermedizin.de/resource/supplementary/12889_2011_3902_MOESM1_ESM.pdf/9493032)
Supplement: MOESM1 [file 9493032]

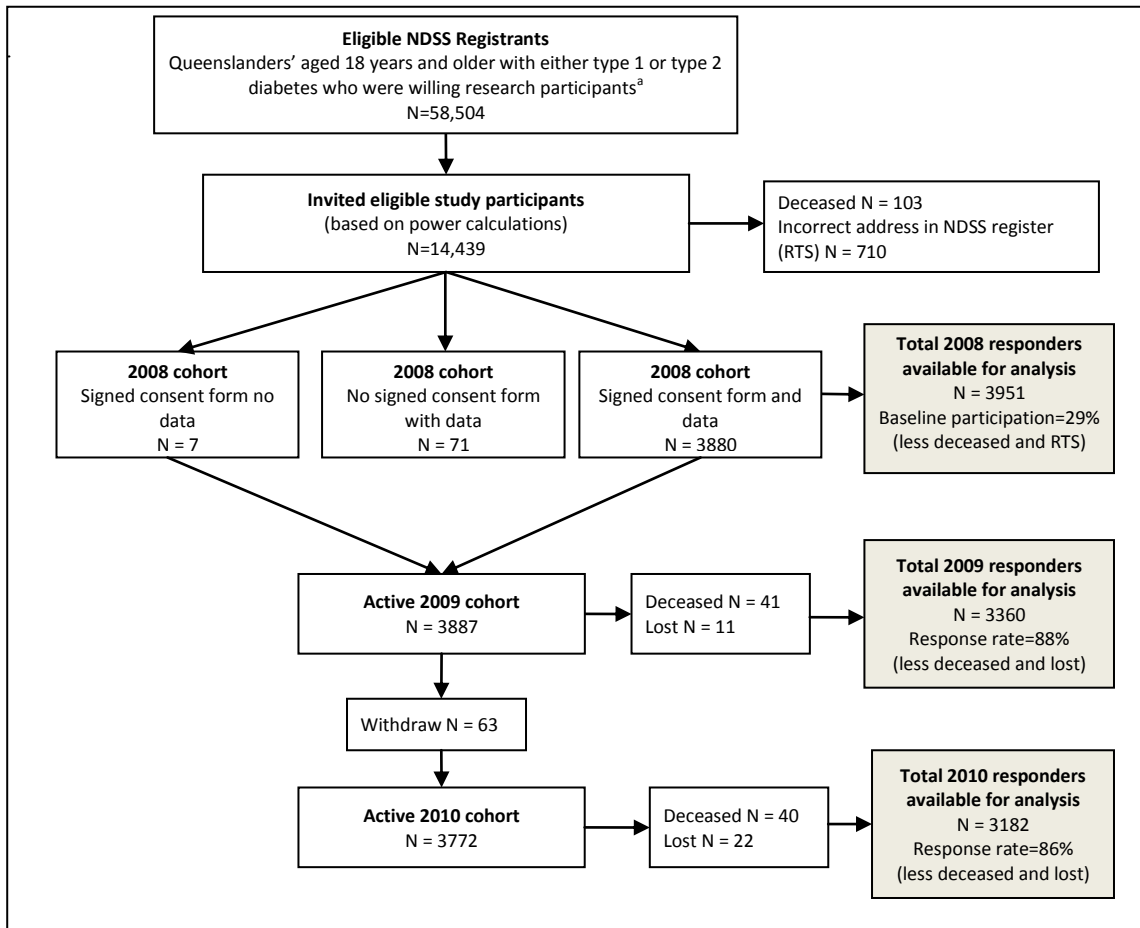

<sup>a</sup>=actively indicated on their NDSS registration that they were willing to be informed about opportunities to participate in research
